# Supplementary material for: “Water-stable boron-iodinated dicarbollide dianions [7,8-nido-C2H2B9I9]2−and [7,8-nido-C2H2B9I8H]2−”
Source: Royal Society of Chemistry journal article supplement (doi:10.1039/b701787a), 2007-01-01
Supplement: b701787a.pdf [file b701787a.pdf]

## Experimental Section

Elemental analyses were performed using a Carlo Erba EA1108 microanalyser. IR spectra were recorded from KBr pellets on a Shimadzu FTIR-8300 spectrophotometer.  $^1\text{H}$  and  $^1\text{H}\{^{11}\text{B}\}$  NMR (300.13 MHz),  $^{13}\text{C}\{^1\text{H}\}$  NMR (75.47 MHz) and  $^{11}\text{B}$  NMR (96.29 MHz) spectra were recorded with a Bruker ARX 300 instrument equipped with the appropriate decoupling accessories. Chemical shift values for  $^{11}\text{B}$  NMR spectra were referenced to external  $\text{BF}_3\leftarrow\text{OEt}_2$  and those for  $^1\text{H}$ ,  $^1\text{H}\{^{11}\text{B}\}$  and  $^{13}\text{C}\{^1\text{H}\}$  NMR spectra were referenced to  $\text{SiMe}_4$ . Chemical shifts are reported in units of parts per million downfield from reference, and all coupling constants in Hz. The mass spectra were recorded in the negative ion mode using a Bruker Biflex MALDI-TOF-MS [ $\text{N}_2$  laser;  $\lambda_{\text{exc}}$  337 nm (0.5 ns pulses); voltage ion source 20.00 kV (Uis1) and 17.50 kV (Uis2)].

3,6- $\text{I}_2$ -1,2-*closo*- $\text{C}_2\text{B}_{10}\text{H}_{10}$  (3), 3,4,5,6,7,8,9,10,11,12- $\text{I}_{10}$ -1,2-*closo*- $\text{C}_2\text{B}_{10}\text{H}_2$  (4), 3,4,5,7,8,9,10,11,12- $\text{I}_9$ -1,2-*closo*- $\text{C}_2\text{B}_{10}\text{H}_3$  (1) and 4,5,7,8,9,10,11,12- $\text{I}_8$ -1,2-*closo*- $\text{C}_2\text{B}_{10}\text{H}_4$  were synthesized according to the literature.<sup>1</sup> 1,2-*closo*- $\text{C}_2\text{B}_{10}\text{H}_{10}$  was supplied by Katchem Ltd. (Prague) and used as received.

**Synthesis of  $[\text{HN}(\text{CH}_3)_3]_2[1,2,3,4,5,6,9,10,11\text{-I}_9\text{-7,8-*nido*-C}_2\text{B}_9\text{H}_2]$ , alternatively  $[\text{HN}(\text{CH}_3)_3]_2[7,8\text{-H}_2\text{-7,8-*nido*-C}_2\text{B}_9\text{I}_9]$ ,  $[\text{HN}(\text{CH}_3)_3]_2[2]$ .**

To a solution of KOH (100mg, 1.78 mmol) in degassed EtOH (50 mL) 3,4,5,6,7,8,9,10,11,12- $\text{I}_{10}$ -1,2-*closo*- $\text{C}_2\text{B}_{10}\text{H}_2$  (500 mg, 0.35 mmol) was added. The solution was refluxed for 3 h. After cooled to room temperature, the solvent was eliminated and the solid was dissolved in 20 mL of water. The solution was neutralized with HCl 1M. Afterwards, a  $[\text{HNMe}_3]\text{Cl}$  water solution was added dropwise to precipitate the compound. The white solid was rinsed with water and diethyl ether obtaining  $[\text{HN}(\text{CH}_3)_3]_2[\textit{nido-1a}]$  (415 mg, yield 86 %). Crystals were successfully

isolated in crystalline form suitable for X-ray diffraction from acetone solution. Elemental analysis calcd. (%) for  $C_8B_9I_9H_{22}N_2$  (1385.72): C 6.93, H 1.60; found C 6.89, H 1.65.  $^1H$  NMR ( $CD_3COCD_3$ ):  $\delta$ = 3.18 (s,  $[HN(CH_3)_3]$ ).  $^{13}C\{^1H\}$  NMR:  $\delta$ = 45.4 (s,  $[HN(CH_3)_3]$ ), 40.4 (m,  $C_{cluster}$ ).  $^{11}B$  NMR:  $\delta$ = -15.9 (s, 2B), -19.3 (s, 3B), -24.9 (s, 2B), -26.7 (s, 1B), -38.9 (s, 1B). MALDI-TOF-MS:  $m/z$  =1266.8 (M+1), 1139.9 (M-I+1), 1013.9 (M-2I+1).

**Synthesis of  $[HN(CH_3)_3]_2[7,8-H_2-7,8-nido-C_2B_9I_9]$  ( $[HN(CH_3)_3]_2[2]$ ) and  $[HN(CH_3)_3]_2[3,7,8-H_3-7,8-nido-C_2B_9I_8]$  ( $[HN(CH_3)_3]_2[3]$ ).**

In an analogous manner, from 3,4,5,7,8,9,10,11,12- $I_9$ -1,2-*closo*- $C_2B_{10}H_3$  (500 mg, 0.39 mmol) was added to a solution of KOH (110 mg, 1.95 mmol) in degassed EtOH (50 mL). The solution was refluxed for 3 h. After, it was cooled to room temperature, the solvent was eliminated and the solid residue was dissolved in 20 mL of water. The solution was neutralized with HCl 1M. Afterwards,  $[HNMe_3]Cl$  in water was added dropwise to the solution to precipitate the compound. The white solid was rinsed with water and diethyl ether obtaining a (1:1) mixture of ( $[HN(CH_3)_3]_2[2]$ . and  $[HN(CH_3)_3]_2[3]$ ). After recrystallization with acetone  $[HN(CH_3)_3]_2[3,7,8-H_3-7,8-nido-C_2B_9I_8]$ , ( $[HN(CH_3)_3]_2[3]$ ) was isolated.  $^1H$  NMR:  $CD_3COCD_3$ ,  $\delta$ = 3.22 (s, 9H;  $[HN(CH_3)_3]$ ), 1.95 (br s, 2H,  $C_{cluster-H}$ ).  $^1H\{^{11}B\}$  NMR:  $CD_3COCD_3$ ,  $\delta$ = 3.22 (s, 9H;  $[HN(CH_3)_3]$ ), 3.00 (br t,  $J(H,H)=6.4$ , 1H, B(3)-H), 1.95 (d,  $J(H,H)=6.4$ , 2H,  $C_{cluster-H}$ ).  $^{13}C\{^1H\}$  NMR:  $\delta$ = 45.4 (s,  $[HN(CH_3)_3]$ ), 41.3 (m,  $C_{cluster}$ ).  $^{11}B$  NMR:  $\delta$ = -16.1 (s, 2B), -19.1 (s, 4B), -27.0 (s, 2B), -41.0 (s, 1B). MALDI-TOF-MS:  $m/z$  =1140.7 (M+1), 1013.7 (M-I+1).

**Synthesis of  $[HN(CH_3)_3][1,2,4,5,6,9,10,11-I_8-7,8-nido-C_2B_9H_3]$ , alternatively  $[HN(CH_3)_3]_2[3,7,8-H_3-7,8-nido-C_2B_9I_8]$  ( $[HN(CH_3)_3]_2[3]$ ).**

In an analogous manner, from 4,5,7,8,9,10,11,12-*I*<sub>8</sub>-1,2-*closo*-C<sub>2</sub>B<sub>10</sub>H<sub>4</sub> (449 mg, 0.39 mmol) was added to a solution of KOH (110 mg, 1.95 mmol) in degassed EtOH (50 mL). The solution was refluxed for 5 h. After, it was cooled to room temperature, the solvent was eliminated and the solid residue was dissolved in 20 mL of water. The solution was neutralized with HCl 1M. Afterwards, [HNMe<sub>3</sub>]Cl in water was added dropwise to the solution to precipitate the compound. <sup>1</sup>H NMR: CD<sub>3</sub>COCD<sub>3</sub>, δ= 3.22 (s, 9H; [HN(CH<sub>3</sub>)<sub>3</sub>]), 1.95 (br s, 2H, C<sub>cluster</sub>-H). <sup>1</sup>H{<sup>11</sup>B} NMR: CD<sub>3</sub>COCD<sub>3</sub>, δ= 3.22 (s, 9H; [HN(CH<sub>3</sub>)<sub>3</sub>]), 3.00 (br t, J(H,H)= 6.4, 1H, B(3)-H), 1.95 (d, J(H,H)= 6.4, 2H, C<sub>cluster</sub>-H). <sup>13</sup>C{<sup>1</sup>H} NMR: δ= 45.4 (s, [HN(CH<sub>3</sub>)<sub>3</sub>]), 41.3 (m, C<sub>cluster</sub>). <sup>11</sup>B NMR: δ= -16.1 (s, 2B), -19.1 (s, 4B), -27.0 (s, 2B), -41.0 (s, 1B). MALDI-TOF-MS: *m/z* =1140.7 (M+1), 1013.7 (M-I+1).

#### Synthesis of [HNMe<sub>3</sub>][3-*I*-7,8-*nido*-C<sub>2</sub>B<sub>9</sub>H<sub>11</sub>].

In an analogous manner, from 3,6-*I*<sub>2</sub>-1,2-*closo*-C<sub>2</sub>B<sub>10</sub>H<sub>10</sub> (154 mg, 0.39 mmol) was added to a solution of KOH (110 mg, 1.95 mmol) in degassed EtOH (50 mL). The solution was refluxed for 3 h. After, it was cooled to room temperature, the solvent was eliminated and the solid residue was dissolved in 20 mL of water. The solution was neutralized with HCl 1M. Afterwards, [HNMe<sub>3</sub>]Cl in water was added dropwise to the solution to precipitate the compound. <sup>1</sup>H{<sup>11</sup>B} NMR: CD<sub>3</sub>COCD<sub>3</sub>, δ= 3.22 (s, 9H, [HN(CH<sub>3</sub>)<sub>3</sub>]), 3.00-0.00 (br m, 8H, B-H<sub>terminal</sub>), 1.95 (br s, 2H, C<sub>cluster</sub>-H), -2.67 (br m, 1H, B-H<sub>bridge</sub>). <sup>13</sup>C{<sup>1</sup>H} NMR: CD<sub>3</sub>COCD<sub>3</sub>, δ= 48.0 (C<sub>cluster</sub>), 45.2 (s, HN(CH<sub>3</sub>)<sub>3</sub>). <sup>11</sup>B NMR: CD<sub>3</sub>COCD<sub>3</sub>, δ= -9.3 (d, <sup>1</sup>J(B,H)= 139, 2B, B(9,11)), -15.5 (d, <sup>1</sup>J(B,H)= 136, 2B, B(5,6)), -19.8 (d, <sup>1</sup>J(B,H)= 153, 2B, B(2,4)), -28.8 (s, 1B, B(3)), -34.1 (dd, <sup>1</sup>J(B,H<sub>terminal</sub>)= 138, <sup>1</sup>J(B,H<sub>bridge</sub>)= 55, 1B, B(10)), -35.8 (d, <sup>1</sup>J(B,H)= 154, 1B, B(1)). MALDI-TOF-MS: *m/z* = 260.39 (M+1), 127.05 (M-I+1).

<sup>1</sup> (a) Teixidor, F.; Barberà, G.; Viñas, C.; Sillanpää, R.; Kivekäs, R. *Inorg. Chem.*, 2006, **45**, 3496. (b) Barbera, G.; Teixidor, F.; Viñas, C.; Sillanpää, R.; Kivekäs, R. *Eur. J. Inorg. Chem.*, 2003, 1511. (c) R. R. Srivastava, D. K. Hamlin, D. S. Wilbur. *J. Org. Chem.* 1996, **61**, 9041.
